# Supplementary material for: Repetitive Bouts of Exhaustive Exercise Induces a Systemic Inflammatory Response and Multi-Organ Damage in Rats
Source: Front Physiol. 2020 Jun 23;11:685. doi: 10.3389/fphys.2020.00685 (PMC7324715; doi:10.3389/fphys.2020.00685)
Supplement: Supplementary file 6 [file Data_Sheet_6.ZIP]

Archive with 6 entries (5 files):
- Lateral Femoral Muscle/
- Lateral Femoral Muscle/D0.jpg
- Lateral Femoral Muscle/D24.jpg
- Lateral Femoral Muscle/S.jpg
- Lateral Femoral Muscle/U0.jpg
- Lateral Femoral Muscle/U24.jpg
